# Supplementary material for: Relationships between the Intakes of Human Milk Components and Body Composition of Breastfed Infants: A Systematic Review
Source: MDPI journal article supplement (doi:10.3390/nu15102370), 2023-05-18
Supplement: s1 [file s1]

# Relationships between the Intakes of Human Milk Components and Body Composition of Breastfed Infants: A Systematic Review

Isabella Norrish <sup>1</sup>, Azhar Sindi <sup>2,3</sup>, Vanessa S. Sakalidis <sup>1</sup>, Ching Tat Lai <sup>1</sup>, Jacki L. McEachran <sup>1</sup>, Mya Thway Tint <sup>4,5</sup>, Sharon L. Perrella <sup>1</sup>, Mark P. Nicol <sup>6</sup>, Zoya Gridneva <sup>1,\*†</sup> and Donna T. Geddes <sup>1,†</sup>

## Supplementary Material: Search Strategy for infant intake of human milk components and infant body composition and growth in MEDLINE, EMBASE, and CINAHL PLUS

**Table S1.** Ovid MEDLINE(R) ALL <1946 to May 17, 2022>

|    |                                                                                                                                                                                                                                                                                                                                                                                                                  |
|----|------------------------------------------------------------------------------------------------------------------------------------------------------------------------------------------------------------------------------------------------------------------------------------------------------------------------------------------------------------------------------------------------------------------|
| 1  | *Milk, Human/                                                                                                                                                                                                                                                                                                                                                                                                    |
| 2  | (breast milk or human milk or milk, breast or milk, human).mp.                                                                                                                                                                                                                                                                                                                                                   |
| 3  | 1 or 2                                                                                                                                                                                                                                                                                                                                                                                                           |
| 4  | (human milk component* or human milk composition or protein or carbohydrate* or fat or macronutrient* or bioactive component* or hormone* or adipokine* or cytokine* or leptin or ghrelin or adiponectin or IGF-1 or casein or whey or total protein or lactose or human milk oligosaccharide* or HMOs or lactoferrin or lysozyme or secretory immunoglobulin A or immunomodulatory or appetite hormone*).ti,ab. |
| 5  | 3 and 4                                                                                                                                                                                                                                                                                                                                                                                                          |
| 6  | *Body Composition/ge, im, ph [Genetics, Immunology, Physiology]                                                                                                                                                                                                                                                                                                                                                  |
| 7  | (body composition or body compositions or composition, body or compositions, body).mp                                                                                                                                                                                                                                                                                                                            |
| 8  | *Growth/ge, im, ph [Genetics, Immunology, Physiology]                                                                                                                                                                                                                                                                                                                                                            |
| 9  | (infant adj3 (growth or bmi or body mass index or weight gain or body weight*)).mp                                                                                                                                                                                                                                                                                                                               |
| 10 | 6 or 7 or 8 or 9                                                                                                                                                                                                                                                                                                                                                                                                 |
| 11 | 5 and 10                                                                                                                                                                                                                                                                                                                                                                                                         |
| 12 | limit 11 to (english language and humans)                                                                                                                                                                                                                                                                                                                                                                        |

[mp=title, abstract, heading word, drug trade name, original title, device manufacturer, drug manufacturer, device trade name, keyword, floating subheading word]

[ti,ab=title, abstract]

**Table S2.** EMBASE <1974 to 2022 May 18>

---

|    |                                                                                                                                                                                                                                                                                                                                                                                                               |
|----|---------------------------------------------------------------------------------------------------------------------------------------------------------------------------------------------------------------------------------------------------------------------------------------------------------------------------------------------------------------------------------------------------------------|
| 1  | *Milk, Human/                                                                                                                                                                                                                                                                                                                                                                                                 |
| 2  | (breast milk or human milk or milk, breast or milk, human).mp.                                                                                                                                                                                                                                                                                                                                                |
| 3  | 1 or 2                                                                                                                                                                                                                                                                                                                                                                                                        |
| 4  | human milk component* or human milk composition or protein or carbohydrate* or fat or macronutrient* or bioactive component* or hormone* or adipokine* or cytokine* or leptin or ghrelin or adiponectin or IGF-1 or casein or whey or total protein or lactose or human milk oligosaccharide* or HMOs or lactoferrin or lysozyme or secretory immunoglobulin A or immunomodulatory or appetite hormone*.ti,ab |
| 5  | 3 and 4                                                                                                                                                                                                                                                                                                                                                                                                       |
| 6  | *body composition/                                                                                                                                                                                                                                                                                                                                                                                            |
| 7  | (body composition or body compositions or composition, body or compositions,body).mp.                                                                                                                                                                                                                                                                                                                         |
| 8  | *growth/                                                                                                                                                                                                                                                                                                                                                                                                      |
| 9  | (infant adj3 (growth or bmi or body mass index or weight gain or body weight*)).mp.                                                                                                                                                                                                                                                                                                                           |
| 10 | 6 or 7 or 8 or 9                                                                                                                                                                                                                                                                                                                                                                                              |
| 11 | 5 and 10                                                                                                                                                                                                                                                                                                                                                                                                      |
| 12 | limit 11 to (human and english language)                                                                                                                                                                                                                                                                                                                                                                      |

---

[mp=title, abstract, heading word, drug trade name, original title, device manufacturer, drug manufacturer, device trade name, keyword, floating subheading word]  
[ti,ab=title, abstract]

**Table S3.** CINAHL PLUS < 1937 to 2022 May 18>

---

|    |                                                                                                                                                                                                                                                                                                                                                                                                         |
|----|---------------------------------------------------------------------------------------------------------------------------------------------------------------------------------------------------------------------------------------------------------------------------------------------------------------------------------------------------------------------------------------------------------|
| 1  | MH "Milk, Human+                                                                                                                                                                                                                                                                                                                                                                                        |
| 2  | breast milk or human milk or milk, breast or milk, human                                                                                                                                                                                                                                                                                                                                                |
| 3  | 1 or 2                                                                                                                                                                                                                                                                                                                                                                                                  |
| 4  | human milk component* or human milk composition or protein or carbohydrate* or fat or macronutrient* or bioactive component* or hormone* or adipokine* or cytokine* or leptin or ghrelin or adiponectin or IGF-1 or casein or whey or total protein or lactose or human milk oligosaccharide* or HMOs or lactoferrin or lysozyme or secretory immunoglobulin A or immunomodulatory or appetite hormone* |
| 5  | 3 and 4                                                                                                                                                                                                                                                                                                                                                                                                 |
| 6  | MM "Body Composition"                                                                                                                                                                                                                                                                                                                                                                                   |
| 7  | body composition or body compositions or composition, body or compositions, body                                                                                                                                                                                                                                                                                                                        |
| 8  | MM "Growth"                                                                                                                                                                                                                                                                                                                                                                                             |
| 9  | infant adj3 (growth or bmi or body mass index or weight gain or body weight*)                                                                                                                                                                                                                                                                                                                           |
| 10 | 6 or 7 or 8 or 9                                                                                                                                                                                                                                                                                                                                                                                        |
| 11 | 5 and 10                                                                                                                                                                                                                                                                                                                                                                                                |
| 12 | limit 11 to (human and english language)                                                                                                                                                                                                                                                                                                                                                                |

---

MH- Exact Subject Heading  
MM- Exact Major Subject Heading  
[Expanders - Apply related words; Apply equivalent subjects]

**Table S4.**

|     |                                                                                                                                                                                                                                                                                                                                                                                                         |                                                                                                |         |
|-----|---------------------------------------------------------------------------------------------------------------------------------------------------------------------------------------------------------------------------------------------------------------------------------------------------------------------------------------------------------------------------------------------------------|------------------------------------------------------------------------------------------------|---------|
| S60 | S59                                                                                                                                                                                                                                                                                                                                                                                                     | Limiters - English Language; Human                                                             | 134     |
| S59 | S53 AND S58                                                                                                                                                                                                                                                                                                                                                                                             |                                                                                                | 195     |
| S58 | S54 OR S55 OR S56 OR S57                                                                                                                                                                                                                                                                                                                                                                                | Expanders - Apply related words; Apply equivalent subjects<br>Search modes - Boolean/Phrase    | 28,377  |
| S57 | infant adj3 (growth or bmi or body mass index or weight gain or body weight*)                                                                                                                                                                                                                                                                                                                           | Expanders - Apply related words; Apply equivalent subjects<br>Search modes<br>- Boolean/Phrase | 312     |
| S56 | MM "Growth"                                                                                                                                                                                                                                                                                                                                                                                             | Expanders - Apply related words; Apply equivalent subjects<br>Search modes - Boolean/Phrase    | 3,258   |
| S55 | body composition or body compositions or composition, body or compositions, body                                                                                                                                                                                                                                                                                                                        | Expanders - Apply related words; Apply equivalent subjects<br>Search modes - Boolean/Phrase    | 25,312  |
| S54 | MM "Body Composition"                                                                                                                                                                                                                                                                                                                                                                                   | Expanders - Apply related words; Apply equivalent subjects<br>Search modes - Boolean/Phrase    | 8,112   |
| S53 | S51 AND S52                                                                                                                                                                                                                                                                                                                                                                                             | Expanders - Apply related words; Apply equivalent subjects<br>Search modes - Boolean/Phrase    | 2,661   |
| S52 | human milk component* or human milk composition or protein or carbohydrate* or fat or macronutrient* or bioactive component* or hormone* or adipokine* or cytokine* or leptin or ghrelin or adiponectin or IGF-1 or casein or whey or total protein or lactose or human milk oligosaccharide* or HMOs or lactoferrin or lysozyme or secretory immunoglobulin A or immunomodulatory or appetite hormone* | Expanders - Apply related words; Apply equivalent subjects<br>Search modes - Boolean/Phrase    | 484,837 |
| S51 | S49 OR S50                                                                                                                                                                                                                                                                                                                                                                                              | Expanders - Apply related words; Apply equivalent subjects<br>Search modes - Boolean/Phrase    | 10,945  |
| S50 | breast milk or human milk or milk, breast or milk, human                                                                                                                                                                                                                                                                                                                                                | Expanders - Apply related words; Apply equivalent subjects<br>Search modes - Boolean/Phrase    | 10,915  |
| S49 | MH "Milk, Human+"                                                                                                                                                                                                                                                                                                                                                                                       | Expanders - Apply related words; Apply equivalent subjects<br>Search modes - Boolean/Phrase    | 7,368   |
